# Supplementary material
Source: publisher site journal article supplement (https://en-cdn.bio-protocol.org/attached/file/20200423/Supplementary%20table%20S3.xlsx)
Supplement: Supplementary file 1 [file Supplementary%20table%20S3.xlsx]

## Sheet: Sheet1
Peptide	m/z	Scan number	MSX scan	MSX scan optimized for intensity	MS/MS required
TKQTAR(H3_3_8)							Table S1: List of m/z signals to acquire in targeted mode for the quantification of (un)modified histone peptides. Column B includes the most abundant m/z signal of the given peptide if ionized using electrospray. The scan number can be used to group multiple peptides into a single scan window, since some have such small mass differences that a dedicated scan window is not necessary. In case the …
H3_3_8 unmod	380.719	1	1	11
H3_3_8 K4me1	387.727	2	1	7
H3_3_8 K4me2	366.722	3	1	6
H3_3_8 K4me3	373.73	4	1	6
H3_3_8 K4ac	373.712	4	1	6
KSTGGKAPR(H3_9_17)
H3_9_17 unmod	507.291	10	2	10	yes
H3_9_17 K9me1	514.298	11	2	9
H3_9_17 K9me2	493.293	12	2	10	yes
H3_9_17 K9me3	500.301	13	2	10
H3_9_17 K9ac	500.283	13	2	10	yes
H3_9_17 K14ac	500.283	13	2	10	yes
H3_9_17 K9me1K14ac	507.291	10	2	10	yes
H3_9_17 K9me2K14ac	486.285	14	2	10
H3_9_17 K9me3K14ac	493.293	12	2	10	yes
H3_9_17 K9acK14ac	493.275	12	2	10
KSTGGKAPR(H3_9_17)
H3_9_17 S10ph	547.274	15	4	5	yes
H3_9_17 K9me1S10ph	554.282	16	4	8
H3_9_17 K9me2S10ph	533.276	17	4	3	yes
H3_9_17 K9me3S10ph	540.284	18	4	6
H3_9_17 K9acS10ph	540.266	18	4	6	yes
H3_9_17 S10phK14ac	540.266	18	4	6	yes
H3_9_17 K9me1S10phK14ac	547.274	15	4	5	yes
H3_9_17 K9me2S10phK14ac	526.269	19	4	6
H3_9_17 K9me3S10phK14ac	533.276	17	4	3	yes
H3_9_17 K9acS10phK14ac	533.258	17	4	3
KQLATKAAR(H3_18_26)
H3_18_26 unmod	549.835	5	1	11
H3_18_26 K23me1	556.843	6	1	7	yes
H3_18_26 K18me1	556.843	6	1	7	yes
H3_18_26 K18me1K23me1	563.851	7	1	6
H3_18_26 K18ac	542.827	8	1	9	yes
H3_18_26 K23ac	542.827	8	1	9	yes
H3_18_26 K18acK23ac	535.82	9	1	9
KSAPATGGVKKPHR(H3_27_40)
H3_27_40 unmod	534.642	20	3	8
H3_27_40 K36me1	539.314	21	3	8	yes
H3_27_40 K27me1	539.314	21	3	8	yes
H3_27_40 K27me2	525.311	22	3	10	yes
H3_27_40 K36me2	525.311	22	3	10	yes
H3_27_40 K27me3	529.983	23	3	9	yes
H3_27_40 K36me3	529.983	23	3	9	yes
H3_27_40 K27me2K36me1	529.983	23	3	9	yes
H3_27_40 K27me1K36me2	529.983	23	3	9	yes
H3_27_40 K27me1K36me1	543.986	24	3	7
H3_27_40 K27me3K36me1	534.654	20	3	8	yes
H3_27_40 K27me1K36me3	534.654	20	3	8	yes
H3_27_40 K27me2K36me2	515.979	25	3	8
H3_27_40 K27me3K36me2	520.651	26	3	7
H3_27_40 K27ac	529.97	23	3	9
KSAPATGGVKKPHR(H3_27_40)
H3_27_40 S28ph	551.96	27	4	3
H3_27_40 K27me1S28ph	556.632	6	4	7
H3_27_40 K27me2S28ph	542.628	8	4	9
H3_27_40 K27me3S28ph	547.3	15	4	5
KSAPSTGGVKKPHR(H33_27_40)
H33_27_40 unmod	539.974	104	5	8
H33_27_40 K36me1	544.646	28	5	4	yes
H33_27_40 K27me1	544.646	28	5	4	yes
H33_27_40 K27me2	530.642	29	5	5	yes
H33_27_40 K36me2	530.642	105	5	5	yes
H33_27_40 K27me3	535.314	9	5	9	yes
H33_27_40 K36me3	535.314	106	5	9	yes
H33_27_40 K27me2K36me1	535.314	9	5	9	yes
H33_27_40 K27me1K36me2	535.314	9	5	9	yes
H33_27_40 K27me1K36me1	549.318	5	5	11
H33_27_40 K27me3K36me1	539.986	21	5	8	yes
H33_27_40 K27me1K36me3	539.986	21	5	8	yes
H33_27_40 K27me2K36me2	521.311	30	5	8
H33_27_40 K27me3K36me2	525.983	22	5	10
H33_27_40 K27ac	535.302	106	5	9
KSAPSTGGVKKPHR(H33_27_40)
H33_27_40 S28ph	557.292	31	6	3
H33_27_40 K27me1S28ph	561.964	32	6	2
H33_27_40 K27me2S28ph	547.96	15	6	5
H33_27_40 K27me3S28ph	552.632	33	6	2
YQKSTELLIR(H3_54_63)			6
H3_54_63 unmod	653.872	34	6	10
H3_54_63 K56me1	660.88	35	6	4
H3_54_63 K56me2	639.875	36	6	5
H3_54_63 K56me3	646.882	37	6	7
H3_54_63 K56ac	646.864	37	6	7
EIAQDFKTDLR(H3_73_83)
H3_73_83 unmod	696.362	38	7	10
H3_73_83 K79me1	703.37	39	7	9
H3_73_83 K79me2	682.365	40	7	7
H3_73_83 K79me3	689.372	41	7	5
H3_73_83 K79ac	689.354	41	7	5
VTIMPKDIQLAR(H3_117_128)
H3_117_128 unmod	720.916	42	7	11
H3_117_128 K122ac	713.908	43	7	3
RGGVKR(H4_40_45)
H4_40_45 unmod	364.73	44	7	10
H4_40_45 K44ac	357.722	45	7	4
GKGGKGLGKGGAKR(H4_4_17)
H4_4_17 unmod	747.941	46	8	11
H4_4_17 K5ac	740.933	47	8	11	yes
H4_4_17 K8ac	740.933	47	8	11	yes
H4_4_17 K12ac	740.933	47	8	11	yes
H4_4_17 K16ac	740.933	47	8	11	yes
H4_4_17 K5acK8ac	733.926	48	8	9	yes
H4_4_17 K5acK12ac	733.926	48	8	9	yes
H4_4_17 K5acK16ac	733.926	48	8	9	yes
H4_4_17 K8acK12ac	733.926	48	8	9	yes
H4_4_17 K8acK16ac	733.926	48	8	9	yes
H4_4_17 K12acK16ac	733.926	48	8	9	yes
H4_4_17 K5acK8acK12ac	726.918	49	8	7	yes
H4_4_17 K5acK8acK16ac	726.918	49	8	7	yes
H4_4_17 K5acK12acK16ac	726.918	49	8	7	yes
H4_4_17 K8acK12acK16ac	726.918	49	8	7	yes
H4_4_17 K5acK8acK12acK16ac	719.91	50	8	6
KVLR(H4_20_23)
H4_20_23 unmod	286.2	51	8	8
H4_20_23 K20me1	293.208	52	8	8
H4_20_23 K20me2	272.203	53	8	11
H4_20_23 K20me3	279.21	54	8	7
H4_20_23 K20ac	279.192	54	8	7
unmod(H1_1_35)
H1_1_35 H11.SETAPVAQAASTATEKPAAAKKTKKPAKAAAPR	896.748	55	9	3
H1_1_35 H12.SEAAPAAPAAAPPAEKAPAKKKAAKKPAGVR	837.723	56	9	2
H1_1_35 H13.SETAPAAPAAPAPVEKTPVKKKAKKTGAAAGKR	913.278	57	9	2	yes
H1_1_35 H14.SETAPAAPAAPAPAEKTPVKKKAR	639.61	36	9	5
H1_1_35 H15.SETAPAETAAPAPVEKSPAKKKTTKKAGAAKR	939.769	58	9	2
unmod(H1_54_81)
H1_54_81 H11.SGVSLAALKKSLAAAGYDVEKNNSR	881.814	59	9	2
H1_54_81 H1v234.SGVSLAALKKALAAAGYDVEKNNSR	891.818	60	9	6
H1_54_81 H15.GGVSLPALKKALAAGGYDVEKNNSR	900.822	61	9	2
H1_54_81 H1T.AGMSLAALKKALAAAGYDVEKNNSR	915.831	62	9	1
SGRGKQGGKAR(H2A1_1_11)
H2A1_1_11 unmod	405.23	63	2	2
H2A1_1_11 S1ac	419.233	64	2	2
H2A1_1_11 K5ac	400.558	65	2	5
H2A1_36_42 unmod	447.228	66	10	11
H2A1_36_42 K36ac	440.22	67	10	5
H2A1_36_42 Y39ac	468.233	68	10	7
KGNYSER(H2A3_36_42)
H2A3_36_42 unmod	455.225	69	10	9
H2A3_36_42 K36ac	448.217	70	10	4
H2A3_36_42 Y39ac	476.23	71	10	3
KGHYAER(H2AX_36_42)
H2AX_36_42 unmod	458.736	72	10	7
H2AX_36_42 K36ac	451.728	73	10	3
H2AX_36_42 Y39ac	479.741	74	10	6
GKQGGKAR(H2A1_4_11)
H2A1_4_11 unmod	457.264	75	11	11	yes
H2A1_4_11 K5ac	450.257	76	11	9	yes
H2A1_4_11 K9ac	450.257	76	11	9	yes
H2A1_4_11 K5acK9ac	443.249	77	11	8
H2A1_4_11 K9me1	464.272	78	11	8	yes
H2A1_4_11 K5me1	464.272	78	11	8	yes
GKQGGKVR(H2AJ_4_11)
H2AJ_4_11 unmod	471.28	79	11	9
H2AJ_4_11 K5ac	464.272	78	11	8	yes
H2AJ_4_11 K9ac	464.272	78	11	8	yes
H2AJ_4_11 K5acK9ac	457.264	75	11	11	yes
H2AJ_4_11 K9me1	478.288	80	11	9	yes
H2AJ_4_11 K5me1	478.288	80	11	9	yes
GKTGGKAR(H2AX_4_11)
H2AX_4_11 unmod	443.759	77	11	8	yes
H2AX_4_11 K5ac	436.751	81	11	6	yes
H2AX_4_11 K9ac	436.751	81	11	6	yes
H2AX_4_11 K5acK9ac	429.743	82	11	1
H2AX_4_11 K9me1	450.767	76	11	9	yes
H2AX_4_11 K5me1	450.767	76	11	9	yes
AGGKAGKDSGKAKAKAVSR(H2AV_1_19)
H2AV_1_19 unmod	689.723	41	12	5
H2AV_1_19 K4ac	685.052	83	12	4	yes
H2AV_1_19 K7ac	685.052	83	12	4	yes
H2AV_1_19 K11ac	685.052	83	12	4	yes
H2AV_1_19 K15ac	685.052	83	12	4	yes
H2AV_1_19 K4acK7ac	680.38	84	12	5	yes
H2AV_1_19 K4acK11ac	680.38	84	12	5	yes
H2AV_1_19 K4acK15ac	680.38	84	12	5	yes
H2AV_1_19 K7acK11ac	680.38	84	12	5	yes
H2AV_1_19 K7acK15ac	680.38	84	12	5	yes
H2AV_1_19 K11acK15ac	680.38	84	12	5	yes
H2AV_1_19 K7acK11acK15ac	675.708	85	12	4	yes
H2AV_1_19 K4acK11acK15ac	675.708	85	12	4	yes
H2AV_1_19 K4acK7acK15ac	675.708	85	12	4	yes
H2AV_1_19 K4acK7acK11ac	675.708	85	12	4	yes
H2AV_1_19 K4acK7acK11acK15ac	671.036	86	12	4
AGGKAGKDSGKAKTKAVSR(H2AZ_1_19)
H2AZ_1_19 unmod	699.727	87	12	8
H2AZ_1_19 K4ac	695.055	88	12	5	yes
H2AZ_1_19 K7ac	695.055	88	12	5	yes
H2AZ_1_19 K11ac	695.055	88	12	5	yes
H2AZ_1_19 K15ac	695.055	88	12	5	yes
H2AZ_1_19 K4acK7ac	690.383	89	12	4	yes
H2AZ_1_19 K4acK11ac	690.383	89	12	4	yes
H2AZ_1_19 K4acK15ac	690.383	89	12	4	yes
H2AZ_1_19 K7acK11ac	690.383	89	12	4	yes
H2AZ_1_19 K7acK15ac	690.383	89	12	4	yes
H2AZ_1_19 K11acK15ac	690.383	89	12	4	yes
H2AZ_1_19 K7acK11acK15ac	685.711	83	12	4	yes
H2AZ_1_19 K4acK11acK15ac	685.711	83	12	4	yes
H2AZ_1_19 K4acK7acK15ac	685.711	83	12	4	yes
H2AZ_1_19 K4acK7acK11ac	685.711	83	12	4	yes
H2AZ_1_19 K4acK7acK11acK15ac	681.039	90	12	3
AKAKTR(H2A1_12_17)
H2A1_12_17 unmod	393.745	91	13	10	yes
H2A1_12_17 K13ac	386.738	92	13	10	yes
H2A1_12_17 K15ac	386.738	92	13	10	yes
H2A1_12_17 K15me1	400.753	65	13	5	yes
H2A1_12_17 K13me1	400.753	65	13	5	yes
H2A1_12_17 T16ac	414.751	93	13	5
AKAKSR(H2A3_12_17)
H2A3_12_17 unmod	386.738	92	13	10	yes
H2A3_12_17 K13ac	379.73	94	13	4	yes
H2A3_12_17 K15ac	379.73	94	13	4	yes
H2A3_12_17 K15me1	393.745	91	13	10	yes
H2A3_12_17 K13me1	393.745	91	13	10	yes
H2A3_12_17 S16ac	407.743	95	13	4
DNKKTR(H2A1_72_77)
H2A1_72_77 unmod	437.243	96	13	11
H2A1_72_77 K74ac	430.235	97	13	6
unmod(H2A_1_88)
H2A_1_88 H2A14s.HLQLAIR	425.767	98	14	11
H2A_1_88 H2AZ.AGGKAGKDSGKAKTKAVSR	690.389	89	14	4
H2A_1_88 H2AY.SAKAGVIFPVGR	629.369	99	14	5
H2A_1_88 H2AX.GKTGGKAR	443.759	77	14	8	yes
unmod(H2B_1_29)
H2B_1_29 1C.PEPAKSAPAPKKGSKKAVTKAQKKDGKKR	905.775	100	14	3
H2B_1_29 1H.PEPAKSAPAPKKGSKKALTKAQKKDGKKR	902.271	101	14	1
H2B_1_29 2B.PDPAKSAPAPKKGSKKAVTKVQKKDGKKR	909.279	102	14	1
H2B_1_29 1B.PEPSKSAPAPKKGSKKAISKAQKKDGKKR	913.278	57	14	2	yes
H2B_1_29 3B.PDPSKSAPAPKKGSKKAVTKAQKKDGKKR	909.774	102	14	1
H2B_1_29 1M.PEPTKSAPAPKKGSKKAVTKAQKKDGKKR	913.278	57	14	2	yes
H2B_1_29 1P.PEPVKSVPAPKKGSKKAVTKAQKKDGKKR	926.543	103	14	1
H2B_1_29 2E.PELAKSAPAPKKGSKKAVTKAQKKDGKKR	909.783	102	14	1
unmod(H2BQC_1_28)
H2BQC_1_28 GVKFR complete	718.424	QC	15	12
H2BQC_1_28 GSTGGKAPR complete	443.741	QC	15	12
H2BQC_1_28 GKAPATSGMVGPHR complete	711.369	QC	15	12
H2BQC_1_28 GSTGGKAPR over	471.75	QC	15	12
H2BQC_1_28 GKAPATSGMVGPHR over	739.379	QC	15	12
H2BQC_1_28 GVKFRGSTGGKAPR inc digestion	793.444	QC	15	12
H2BQC_1_28 GSTGGKAPRGKAPATSGMVGPHR inc digestion	763.734	QC	15	12
H2BQC_1_28 GKAPATSGMVGPHR oxidation	719.368	QC	15	12
H2BQC_1_28 GSTGGK inc derivatization	506.257	QC	15	12
H2BQC_1_28 APATSGMVGPHR inc derivatization	590.798	QC	15	12
